# Supplementary material for: Dissemination of Piscine orthoreovirus-1 (PRV-1) in Atlantic Salmon (Salmo salar) during the Early and Regenerating Phases of Infection
Source: MDPI journal article supplement (doi:10.3390/pathogens9020143), 2020-02-20
Supplement: s1 [file s1]

## Supplementary figures

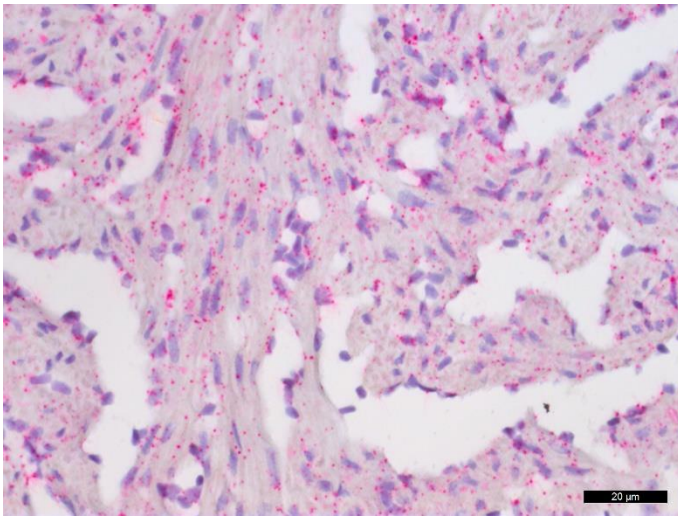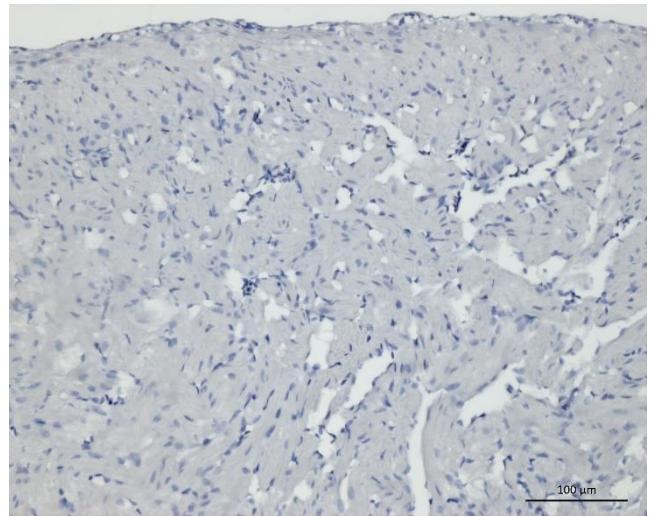

**Figure S1.** ISH positive control sections stained with Atlantic salmon (*Salmo salar*) peptidylprolyl isomerase B mRNA. Negative control sections stained with a probe against the *Bacillus subtilis* strain SMY methylglyoxal synthase (mgsA) gene.

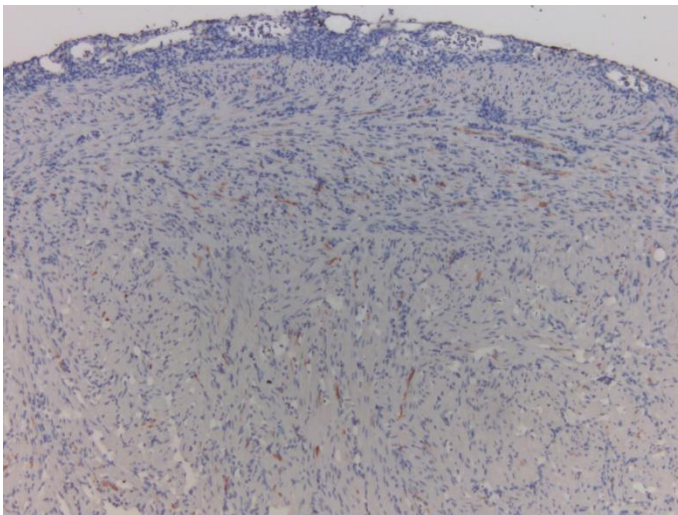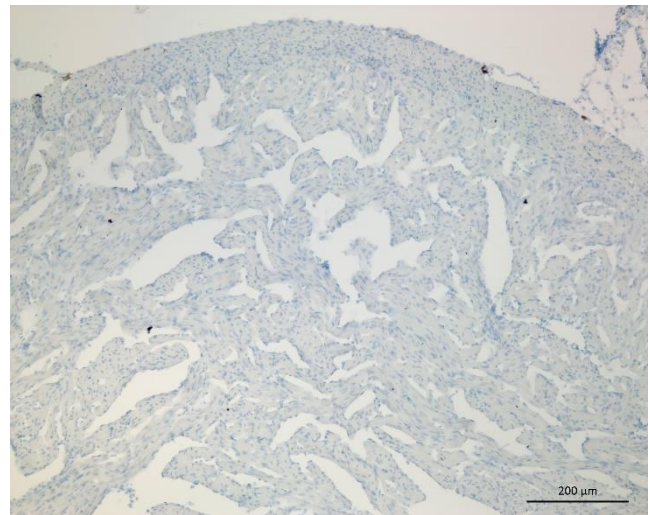

**Figure S2.** Immunohistochemistry (IHC) positive control Atlantic salmon (*Salmo salar*) heart sections and negative control tissues stained with PRV-1 σ1 antibody.
